# Supplementary material for: Improving the metabolic fidelity of cancer models with a physiological cell culture medium
Source: PubMed Central journal article supplement (PMC6314821; doi:10.1126/sciadv.aau7314), 2019-01-02
Supplement: aau7314_SM.pdf [file aau7314_SM.pdf]

## Supplementary Materials for

### **Improving the metabolic fidelity of cancer models with a physiological cell culture medium**

Johan Vande Voorde, Tobias Ackermann, Nadja Pfetzer, David Sumpton, Gillian Mackay, Gabriela Kalna, Colin Nixon, Karen Blyth, Eyal Gottlieb, Saverio Tardito\*

\*Corresponding author. Email: [s.tardito@beatson.gla.ac.uk](mailto:s.tardito@beatson.gla.ac.uk)

Published 2 January 2019, *Sci. Adv.* **5**, eaau7314 (2019)  
DOI: 10.1126/sciadv.aau7314

#### **This PDF file includes:**

- Table S1. Comparison between the formulations of Plasmax and HPLM.
- Fig. S1. Selenite-dependent colony formation.
- Fig. S2. PCA of gene expression.
- Fig. S3. Isotopologue distribution of urea cycle intermediates.

SUPPLEMENTARY MATERIAL

**Table S1. Comparison between the formulations of Plasmax and HPLM.**

|                                           | Concentration ( $\mu\text{M}$ ) |      |
|-------------------------------------------|---------------------------------|------|
|                                           | Plasmax                         | HPLM |
| <b>Proteinogenic Amino Acids</b>          |                                 |      |
| L-Alanine <sup>1</sup>                    | 510                             | 430  |
| L-Arginine <sup>1</sup>                   | 64                              | 110  |
| L-Asparagine <sup>1</sup>                 | 41                              | 50   |
| L-Aspartic acid <sup>1</sup>              | 6                               | 20   |
| L-Cysteine <sup>2</sup>                   | 33                              | 40   |
| L-Glutamate <sup>1</sup>                  | 98                              | 80   |
| L-Glutamine <sup>5</sup>                  | 650                             | 550  |
| Glycine <sup>1</sup>                      | 330                             | 300  |
| L-Histidine <sup>1</sup>                  | 120                             | 110  |
| L-Isoleucine <sup>1</sup>                 | 140                             | 70   |
| L-Leucine <sup>1</sup>                    | 170                             | 160  |
| L-Lysine <sup>1</sup>                     | 220                             | 200  |
| L-Methionine <sup>1</sup>                 | 30                              | 30   |
| L-Phenylalanine <sup>1</sup>              | 68                              | 80   |
| L-Proline <sup>1</sup>                    | 360                             | 200  |
| L-Serine <sup>1</sup>                     | 140                             | 150  |
| L-Threonine <sup>1</sup>                  | 240                             | 140  |
| L-Tryptophan <sup>1</sup>                 | 78                              | 60   |
| L-Tyrosine <sup>1</sup>                   | 74                              | 80   |
| L-Valine <sup>1</sup>                     | 230                             | 220  |
| <b>Non-proteinogenic Amino Acids</b>      |                                 |      |
| $\alpha$ -Aminobutyrate <sup>2</sup>      | 41                              | 20   |
| L-Citrulline <sup>1</sup>                 | 55                              | 40   |
| L-Cystine <sup>1</sup>                    | 65                              | 100  |
| L-Homocysteine <sup>2</sup>               | 9                               | NA   |
| 4-Hydroxy-L-proline <sup>2</sup>          | 13                              | 20   |
| L-Ornithine <sup>1</sup>                  | 80                              | 70   |
| L-Pyroglutamate <sup>2</sup>              | 20                              | NA   |
| <b>Amino Acids Derivatives</b>            |                                 |      |
| L-Acetyl glycine <sup>2</sup>             | 70                              | 90   |
| L-Carnosine <sup>2</sup>                  | 6                               | NA   |
| Glutathione (reduced) <sup>2</sup>        | 37                              | 25   |
| Taurine <sup>2</sup>                      | 130                             | 90   |
| N-Trimethylglycine (betaine) <sup>2</sup> | 72                              | 70   |
| <b>Other Components</b>                   |                                 |      |
| Acetate <sup>2</sup>                      | 42                              | 40   |
| Acetone <sup>2</sup>                      | 55                              | 60   |
| Acetyl carnitine <sup>2</sup>             | 5                               | NA   |
| Citrate <sup>2</sup>                      | 114                             | 130  |
| Carnitine <sup>2</sup>                    | 46                              | 40   |
| Creatine <sup>2</sup>                     | 37                              | 40   |
| Creatinine <sup>2</sup>                   | 74                              | 75   |
| Formate <sup>2</sup>                      | 33                              | 50   |
| Fructose                                  | NA                              | 40   |
| Galactose                                 | NA                              | 60   |
| D-Glucose <sup>7</sup>                    | 5560                            | 5000 |
| Glycerol <sup>2</sup>                     | 82                              | 120  |
| 2-Hydroxybutyrate <sup>2</sup>            | 31                              | 50   |

|                                             |        |        |
|---------------------------------------------|--------|--------|
| 3-Hydroxybutyrate <sup>2</sup>              | 77     | 50     |
| 3-Hydroxyisobutyrate <sup>2</sup>           | 20     | NA     |
| Hypoxanthine <sup>2</sup>                   | 5      | 10     |
| Lactate <sup>2</sup>                        | 500    | 1600   |
| Malonate                                    | NA     | 10     |
| Methyl acetoacetate <sup>2</sup>            | 41     | NA     |
| Phenol Red <sup>7</sup>                     | 25     | 14     |
| Pyruvate <sup>8</sup>                       | 100    | 50     |
| Succinate <sup>2</sup>                      | 23     | 20     |
| Uracil <sup>2</sup>                         | 2      | NA     |
| Urate <sup>4</sup>                          | 270    | 350    |
| Urea <sup>2</sup>                           | 3000   | 5000   |
| Uridine <sup>2</sup>                        | 3      | NA     |
| <b>Inorganic Salts</b>                      |        |        |
| Ammonium Chloride <sup>3</sup>              | 50     | 40     |
| Calcium Chloride <sup>7</sup>               | 1800   | 2350   |
| Calcium Nitrate                             | NA     | 40     |
| Magnesium Chloride                          | NA     | 480    |
| Magnesium Sulfate <sup>7</sup>              | 813    | 350    |
| Potassium Chloride <sup>7</sup>             | 5330   | 4100   |
| Sodium Bicarbonate <sup>7</sup>             | 26191  | 24000  |
| Sodium Chloride <sup>7</sup>                | 118706 | 105000 |
| Sodium Phosphate monobasic <sup>7</sup>     | 1010   | 870*   |
| <b>Trace Elements</b>                       |        |        |
| Ammonium Metavanadate <sup>3</sup>          | 0.0026 | NA     |
| Cupric Sulfate <sup>3</sup>                 | 0.0052 | NA     |
| Ferric Nitrate <sup>3</sup>                 | 0.1238 | NA     |
| Ferric Sulfate <sup>3</sup>                 | 1.0428 | NA     |
| Manganous Chloride <sup>3</sup>             | 0.0002 | NA     |
| Sodium Selenite <sup>3</sup>                | 0.0289 | NA     |
| Zinc Sulfate <sup>3</sup>                   | 1.5    | NA     |
| <b>Vitamins</b>                             |        |        |
| p-Aminobenzoate                             | NA     | 7.3    |
| Ascorbate <sup>6</sup>                      | 62     | NA     |
| D-Biotin <sup>5</sup>                       | 4.1    | 0.8    |
| Choline <sup>5</sup>                        | 7.1    | 21.5   |
| Folate <sup>5</sup>                         | 2.3    | 2.3    |
| myo-Inositol <sup>5</sup>                   | 11.1   | 194.3  |
| Niacinamide <sup>5</sup>                    | 8.2    | 8.2    |
| D-Pantothenic acid hemicalcium <sup>5</sup> | 4.2    | 1.05   |
| Pyridoxine <sup>5</sup>                     | 4.9    | 4.9    |
| Riboflavin <sup>5</sup>                     | 0.3    | 0.5    |
| Thiamine <sup>5</sup>                       | 3      | 3      |
| Vitamin B12 <sup>6</sup>                    | 0.005  | 0.0037 |

\* present as dibasic salt

Formulations of Plasmix and HPLM (Cantor et al. 2017, Cell 169, 258-272). Plasmix components were dissolved and stocked as follow: <sup>1</sup> 100x solution 1, <sup>2</sup> 100x solution 2, <sup>3</sup> 1,000x solution 3 (trace element concentrations as in Advanced DMEM-F12, Thermo Fisher Scientific cat no. 12634028), <sup>4</sup> 500x solution 4, <sup>5</sup> 100x commercially available BME vitamin mix. <sup>6</sup> 100,000x individual stocks, supplemented to BME vitamin mix to obtain a 100x stock solution 5. <sup>7</sup> included in the commercially available EBSS. <sup>8</sup> individual stock solutions commercially available.

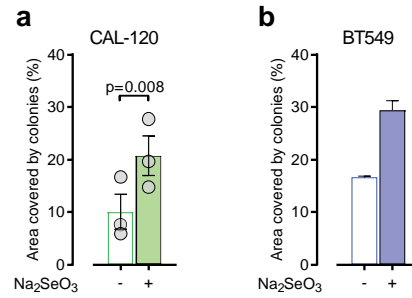

**Fig. S1. Selenite-dependent colony formation.** Quantification of colony formation assays performed with (a) CAL-120 cells and (b) BT549 seeded 500cells/well and incubated in DMEM-F12 with 28nM  $\text{Na}_2\text{SeO}_3$ , as indicated. Mean  $\pm$  SEM; (a)  $n = 3$  (b)  $n=1$  independent experiments. Each dot represents an independent experiment.  $p$  value refers to a two-tailed t-test for paired homoscedastic samples.

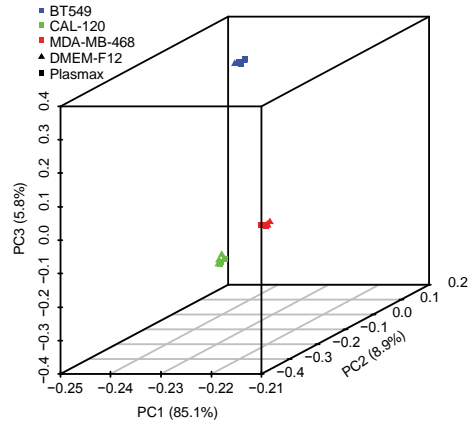

**Fig. S2. PCA of gene expression obtained from RNA sequencing data of BT549, CAL-120, and MDA-MB-468 cells cultured in Plasmix or DMEM-F12, in normoxia.** Each dot represents an independent experiment.

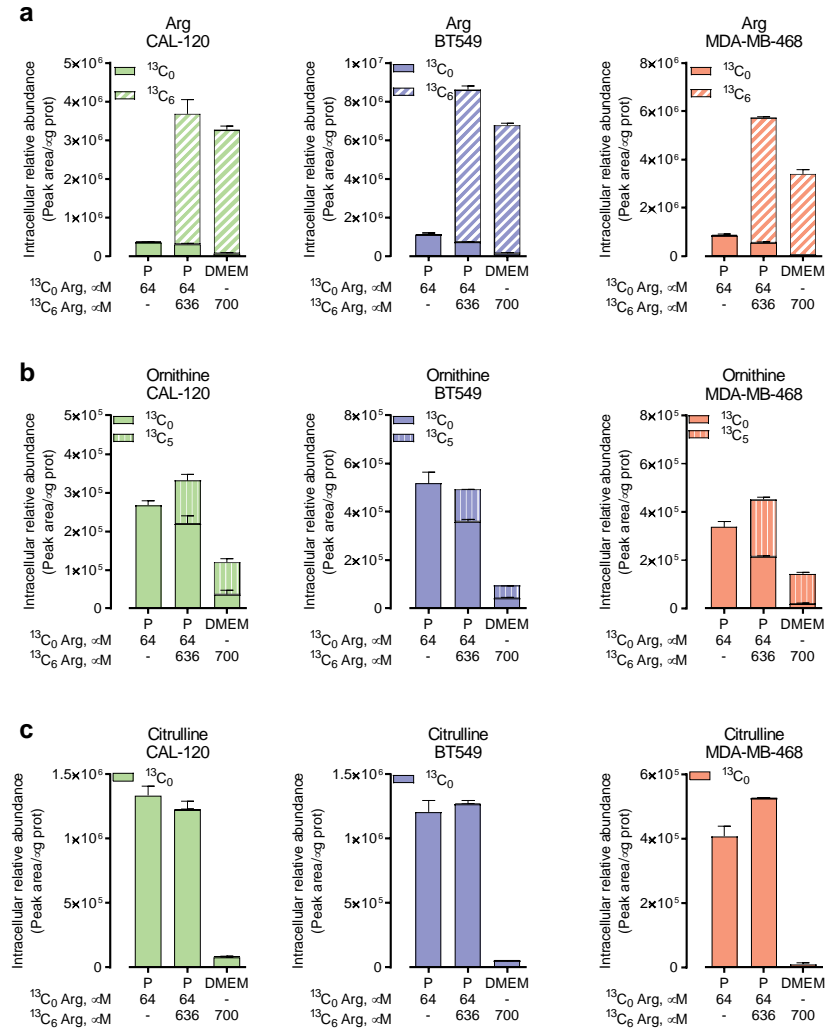

**Fig. S3. Isotopologue distribution of urea cycle intermediates.** Intracellular levels of (a)  $^{13}\text{C}$  arginine (b)  $^{13}\text{C}$  ornithine and (c)  $^{13}\text{C}$  citrulline in BT549, CAL-120 and MDA-MB-468 cells cultured for 48 hours in Plasmag (P) and DMEM supplemented with  $^{13}\text{C}_6$  and  $^{13}\text{C}_0$  arginine at the indicated concentrations. Mean  $\pm$  SEM; CAL-120 (n = 3 independent experiments); BT549 and MDA-MB-468 (n = 2 independent experiments).
